# Supplementary material for: Genomic Tools for the Identification of Loci Associated with Facial Eczema in New Zealand Sheep
Source: MDPI journal article supplement (doi:10.3390/genes12101560), 2021-09-30
Supplement: s1 [file s1]

## Supplementary material

### Supplementary Methods: Proteomic analysis of blood samples from genotyped animals

Animals were managed following the provisions of the New Zealand Animal Welfare Act 1999, and the New Zealand Codes of Welfare developed under sections 68–79 of the Act. The collection of blood samples was approved by the AgResearch Animal Ethics Committee (Application number 14842) and complied with the institutional Codes of Ethical Conduct for the Use of Animals in Research, Testing and Teaching, as prescribed in the New Zealand Animal Welfare Act of 1999 and its amendments.

To test whether SNP markers were predictive of haemoglobin phenotype (Hb-A, Hb-AB or Hb-B), blood was collected from 12 animals with different genotypes in the  $\beta$ -globin locus, using SNPs rs405755938 and rs402069107 (Table 1). Blood samples were obtained by jugular venipuncture and collected into 7-ml vacutainers containing EDTA as an anticoagulant.

Blood samples were centrifuged for 1,000 g for 20 mins at 4°C and the plasma removed. The red blood cells were then washed three times with cold 0.9% sodium chloride solution, the wash solution being removed by centrifugation at 1,000 g for 20 mins at 4°C. The cells were then lysed by gentle mixing with three-volume equivalents of 3.75 M phosphate buffer pH 7.2 at 4°C, then centrifuged at 19,000 g for 10 mins at 4°C. The supernatant was removed and stored at -20°C until further use.

Protein quantitation was performed on 20-times diluted samples with a Direct Detect Spectrometer (Millipore, Burlington MS, USA). 1  $\mu$ g of each sample was then loaded onto a Criterion Tris-Tricine 4-20%T polyacrylamide gel in a Criterion Cell (Bio-Rad, Hercules, CA, USA) and separated by SDS-PAGE at 200 V, 80 mA and 15 W for 40 mins. The proteins were visualised by staining with Colloidal Coomassie Blue G250 (Plowman et al, 2010).

The protein bands were excised from the gel and destained by washing twice with 200 mM ammonium bicarbonate and 50% acetonitrile for 1 hr at 37°C. The bands were then reduced with a solution of 50 mM tris(2-carboxyethyl)phosphine in 100 mM ammonium bicarbonate at 56°C and then labelled with 150 mM iodoacetamide in 100 mM ammonium bicarbonate. The gel pieces were then digested overnight with 2  $\mu$ g of TPCK-trypsin in 50 mM ammonium bicarbonate and 10% acetonitrile (AcN). Peptides were extracted from the gel by vortexing for 10 min in digestion buffer, followed by a solution of 50% AcN and then 80% AcN, all extracts being pooled with the original digestion supernatant. The extracts were then concentrated on a Centrivap vacuum centrifugal concentrator.

LC-MS was performed on a nanoflow Ultimate 3000 UPLC (Dionex) coupled to maXis Impact HD mass spectrometer equipped with a CaptiveSpray source (Bruker Daltonik, Bremen, Germany). For each sample, 1  $\mu$ L of the sample was loaded on a C18 PepMap100 nano-Trap column (300  $\mu$ m ID x 5 mm, 5 micron 100Å) at a flow rate of 3000 nL/min. The trap column was then switched in line with the analytical column ProntoSIL C18AQ (100  $\mu$ m ID x 150 mm 3 micron 200Å). The reverse-phase elution gradient was from 2% to 20% to

45%B over 60 min, total 85 min at a flow rate of 600 nL/min. Solvent A was LCMS-grade water with 0.1% Formic acid; solvent B was LCMS-grade ACN with 0.1% FA.

The peptide digests were measured in positive ion MS mode with a mass range of  $m/z$  350–1500 on the Impact HD mass spectrometer (Bruker Daltonik) in data-dependent MS/MS mode, with an acquisition speed of 2 Hz in MS and 1-20 Hz in MS/MS mode depending on precursor intensity. Ten precursors were selected in the  $m/z$  350–1200 range, with a preference for doubly or triply charged peptides. The analysis was performed in positive ionization mode with a dynamic exclusion of 60 sec.

Following the LC-MS run, the QTOF data were searched using Peaks Studio 10.0 against a precursor mass tolerance of 10 ppm; fragment mass tolerance of 0.05 Da, a taxonomy of *Ovis aries* (with an in-house NCBI nr database), with trypsin as proteolytic enzyme and up to 2 miscleavages allowed. Carbamidomethyl (C) was specified as a fixed modification, and oxidation (M), deamidation (NQ) and phosphorylation (STY) were chosen as variable modifications. A false discovery rate (FDR) of 1% was used for peptide identification in Peaks. In addition, the Peaks post-translational modification (PTM) A-score was set to 50, *de novo* only ALC > 80% and only proteins with a minimum of 1 unique peptide identification were included.

The A and B variants of sheep  $\beta$ -globin were characterised by the following amino acid changes from A (UniProt ID: Q1KYZ7)  $\rightarrow$  B (UniProt ID: P02075) respectively: S<sup>59</sup>  $\rightarrow$  N, A<sup>67</sup>  $\rightarrow$  P, VQ<sup>75</sup>  $\rightarrow$  MK, S<sup>119</sup>  $\rightarrow$  N, E<sup>128</sup>  $\rightarrow$  D and R<sup>143</sup>  $\rightarrow$  K. These amino acid changes are found in four tryptic peptides from haemoglobin  $\beta$ . In the A variant these peptides are defined by the following residues: 40-58, 65-81, 116-131 and 132-143. In the B variant, the change of Q<sup>75</sup>  $\rightarrow$  K results in a shorter peptide 65-75 but the other identifier tryptic peptides are of the same length. In SDS-PAGE sheep haemoglobin separates into two major bands around 15 kDa (Supplementary Figure 2).

Plowman, J.E., et al., *Characterisation of low abundance wool proteins through novel differential extraction techniques*. Electrophoresis, 2010. **31**(12): p. 1937-1946.

**Table S1: FE discovery GWAS SNPs included in the design of the Illumina OvineLD BeadChip.** Markers that mapped to more than one position are denoted with a \*.

| Assembly          | OAR_v3.1        |            | Oar_v4.0        |            | Oar_rambouillet_v1.0 |            | ARS-UI_Ramb_v2.0 |            |
|-------------------|-----------------|------------|-----------------|------------|----------------------|------------|------------------|------------|
| GenBank accession | GCA_000298735.2 |            | GCA_000298735.2 |            | GCA_002742125.1      |            | GCA_016772045.1  |            |
| RSID              | Chr.            | Position   | Chr.            | Position   | Chr.                 | Position   | Chr.             | Position   |
| rs428441961*      | 15              | 47,425,386 | 15              | 47,318,992 | 15                   | 51,796,047 | 15               | 47,849,872 |
| rs420422985       | 15              | 47,453,268 | 15              | 47,346,818 | 15                   | 51,823,702 | 15               | 47,877,515 |
| rs418466829       | 15              | 47,458,507 | 15              | 47,352,057 | 15                   | 51,828,912 | 15               | 47,882,722 |
| rs426368387       | 15              | 47,473,013 | 15              | 47,367,857 | 15                   | 51,843,345 | 15               | 47,897,154 |
| rs398930318*      | 15              | 47,489,709 | 15              | 47,384,553 | 15                   | 51,859,818 | 15               | 47,913,671 |
| rs409516182*      | 15              | 47,494,685 | 15              | 47,389,529 | 15                   | 51,872,554 | 15               | 47,926,390 |
| rs423653664       | 15              | 47,504,887 | 15              | 47,399,783 | 15                   | 51,882,659 | 15               | 47,936,440 |
| rs398614689       | 15              | 47,505,272 | 15              | 47,400,168 | 15                   | 65,525,783 | 15               | 47,936,821 |
| rs429709432*      | 15              | 47,513,135 | 15              | 47,408,031 | 15                   | 51,805,138 | 15               | 47,944,916 |
| rs429709432*      | -               | -          | -               | -          | 15                   | 51,891,091 | -                | -          |
| rs400809788       | 15              | 47,519,231 | 15              | 47,414,127 | 15                   | 51,897,388 | 15               | 47,951,156 |
| rs405755938       | 15              | 47,519,931 | 15              | 47,414,827 | 15                   | 51,898,128 | 15               | 47,951,894 |
| rs428441961*      | -               | -          | -               | -          | 15                   | 51,900,599 | 15               | 47,954,363 |
| rs427105378*      | 15              | 47,564,204 | 15              | 47,459,238 | 15                   | 51,981,666 | 15               | 48,035,417 |
| rs402069107       | 15              | 47,567,105 | 15              | 47,462,139 | 15                   | 51,984,579 | 15               | 48,038,330 |
| rs411410654       | 15              | 47,569,499 | 15              | 47,464,533 | 15                   | 51,986,973 | 15               | 48,040,724 |
| rs430842113       | 15              | 47,570,178 | 15              | 47,465,212 | 15                   | 51,987,652 | 15               | 48,041,403 |
| rs408827344*      | 15              | 47,586,265 | 15              | 47,481,299 | 15                   | 51,961,760 | 15               | 48,015,512 |
| rs408827344*      | -               | -          | -               | -          | 15                   | 52,004,953 | 15               | 48,058,696 |
| rs427105378*      | 15              | 47,608,325 | 15              | 47,503,541 | 15                   | 52,092,964 | 15               | 48,080,935 |
| rs425052505       | 15              | 47,609,978 | 15              | 47,505,194 | 15                   | 52,094,618 | 15               | 48,082,589 |
| rs398930318*      | -               | -          | -               | -          | 15                   | 65,510,363 | -                | -          |
| rs409516182*      | -               | -          | -               | -          | 15                   | 65,515,335 | -                | -          |
| rs420122004       | 24              | 932,184    | 24              | 919,490    | 24                   | 940,274    | 24               | 1,506,069  |
| rs425270036       | 24              | 1,155,234  | 24              | 1,152,961  | 24                   | 1,125,292  | 24               | 1,690,999  |
| rs409675199       | 24              | 1,156,263  | 24              | 1,153,990  | 24                   | 1,126,288  | 24               | 1,691,995  |
| rs422823972       | 24              | 1,459,984  | 24              | 1,460,494  | 24                   | 1,430,759  | 24               | 1,996,418  |
| rs404562811       | 24              | 3,795,530  | 24              | 3,795,523  | 24                   | 3,829,144  | 24               | 4,340,054  |

**Figure S1: Quantile-quantile (QQ) plots of genome-wide association analysis for Facial Eczema in New Zealand sheep.**

Efficient Mixed-Model Association eXpedited (EMMAX) analysis using a kinship matrix (A, C) were conducted using log-transformed serum GGT levels at 21 days after a measured sporidesmin challenge (GGT21), with the contemporary group and the first two principal components fitted as covariates. Genotype association tests (B, D), fitting two principal components, were performed using residuals obtained from ASReml after fitting pedigree and the fixed effect of the contemporary group. Animals had either high-density (genotyped using either the Ovine Infinium® HD SNP BeadChip or the Illumina OvineSNP50 BeadChip, and imputed to HD) (A, B) or low-density (Illumina OvineLD BeadChip) (C, D) genotypes.

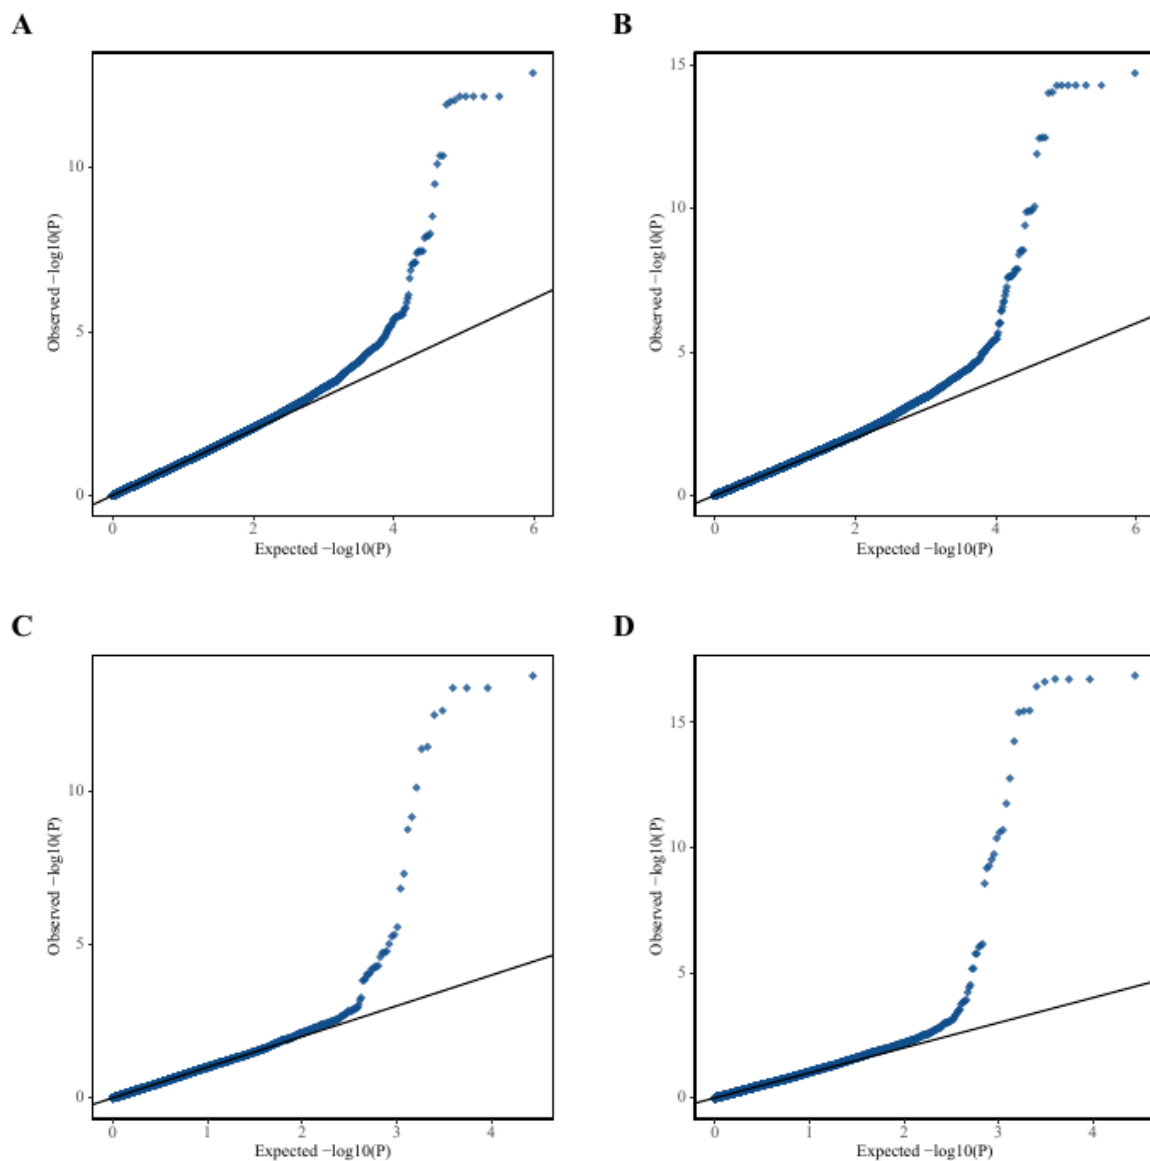

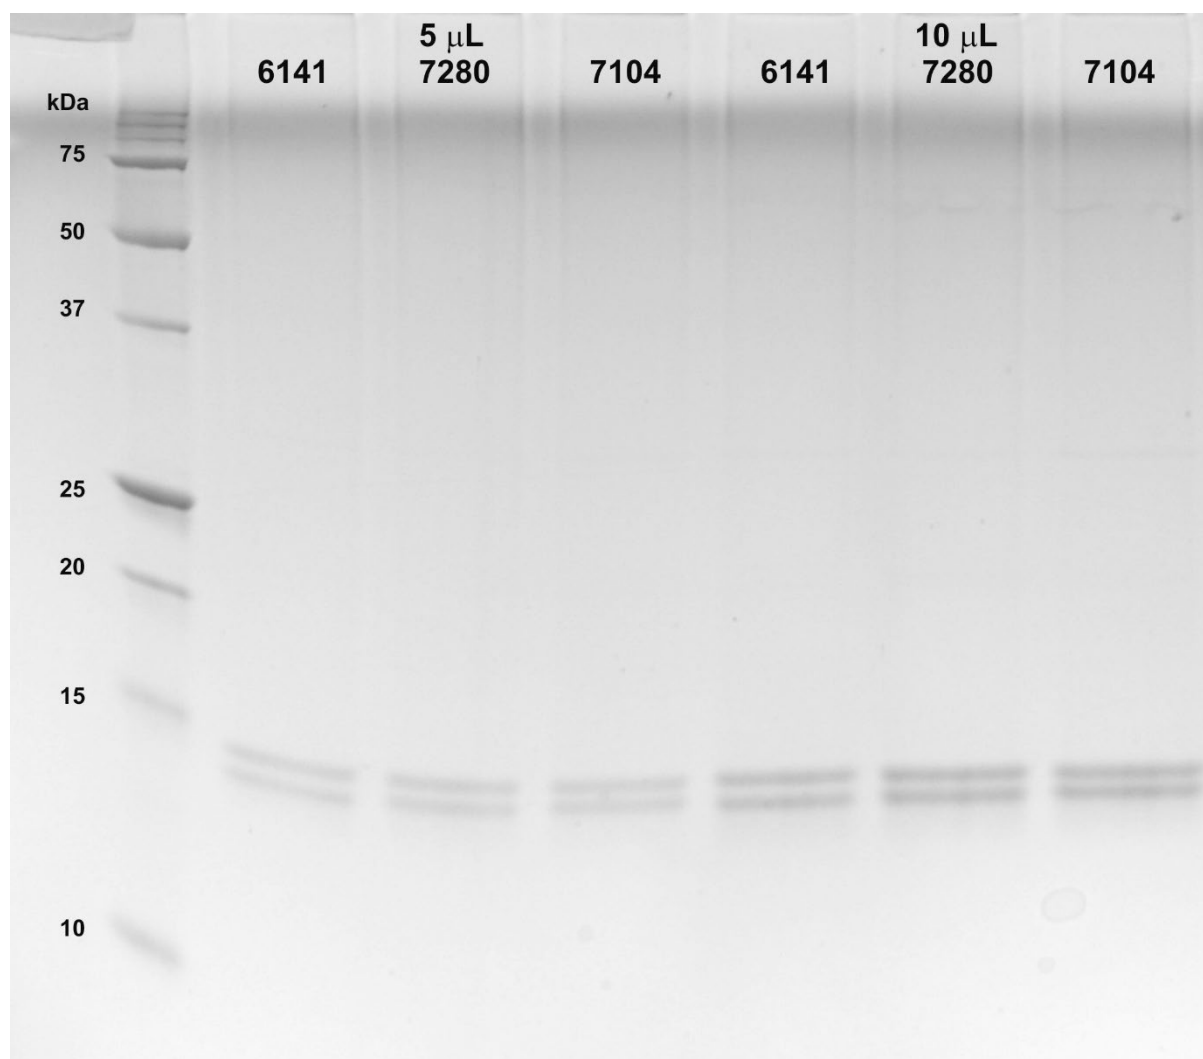

**Figure S2: Separation of haemoglobins from sheep blood by 4-20%T Tris-Tricine SDS-PAGE.**
